# Supplementary material for: Association Study between Mucin 4 (MUC4) Polymorphisms and Idiopathic Recurrent Pregnancy Loss in a Korean Population
Source: MDPI journal article supplement (doi:10.3390/genes13060937), 2022-05-24
Supplement: s1 [file s1]

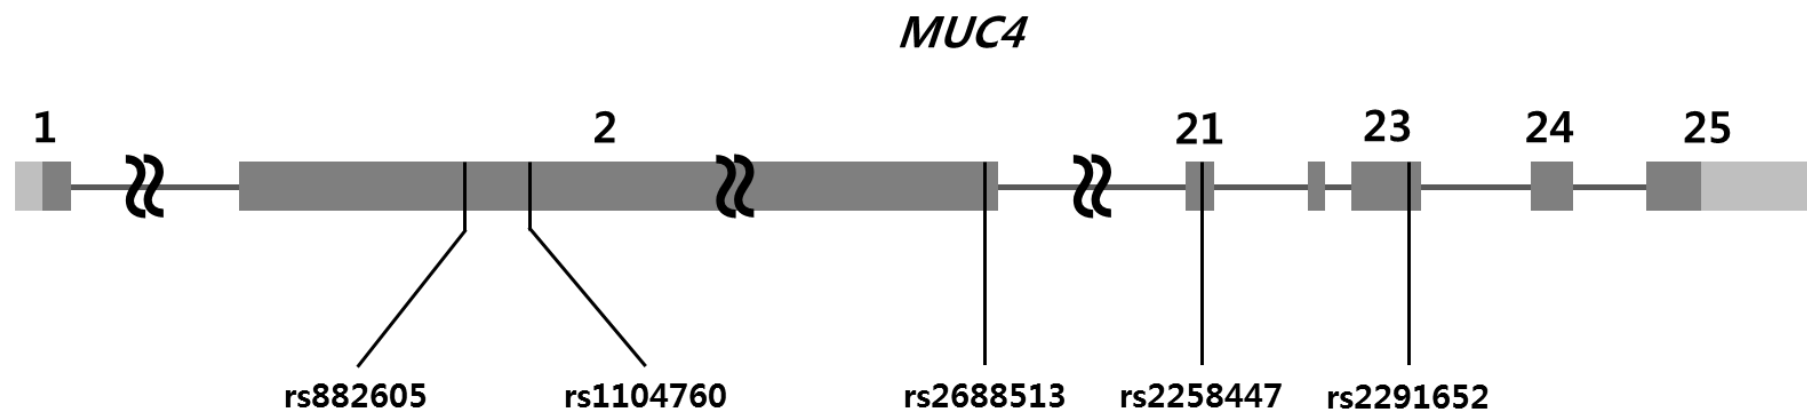

**Supplementary Figure S1.** Schematic of *MUC4* polymorphism locations.

**Supplementary Table S1. Haplotype analysis of *MUC4* polymorphisms in RPL patients and control participants**

| Haplotypes                                                                                         | Controls<br>(n= 478) | RPL cases<br>(n=748) | OR (95% CI)              | <i>P</i> <sup>a</sup> | FDR- <i>P</i> <sup>b</sup> |
|----------------------------------------------------------------------------------------------------|----------------------|----------------------|--------------------------|-----------------------|----------------------------|
| <b>rs882605 C&gt;A / rs1104760 A&gt;G / rs2688513 A&gt;G / rs2258447 C&gt;T / rs2291652 A&gt;G</b> |                      |                      |                          |                       |                            |
| C-A-A-C-A                                                                                          | 286 (59.8)           | 421 (56.3)           | 1.000 (reference)        |                       |                            |
| C-A-A-C-G                                                                                          | 34 (7.1)             | 55 (7.4)             | 1.099 (0.698 - 1.729)    | 0.683                 | 0.829                      |
| C-A-A-T-A                                                                                          | 3 (0.7)              | 6 (0.8)              | 1.359 (0.337 - 5.479)    | 0.746                 | 0.861                      |
| C-A-A-T-G                                                                                          | 9 (2.0)              | 5 (0.6)              | 0.377 (0.125 - 1.138)    | 0.073                 | 0.234                      |
| C-A-G-C-A                                                                                          | 25 (5.3)             | 20 (2.6)             | 0.544 (0.296 - 0.997)    | 0.046                 | 0.197                      |
| C-A-G-C-G                                                                                          | 4 (0.8)              | 1 (0.2)              | 0.170 (0.019 - 1.528)    | 0.164                 | 0.354                      |
| C-A-G-T-A                                                                                          | 4 (0.9)              | 2 (0.3)              | 0.340 (0.062 - 1.868)    | 0.231                 | 0.462                      |
| C-A-G-T-G                                                                                          | 0 (0.0)              | 5 (0.6)              | 7.477 (0.412 - 135.800)  | 0.086                 | 0.235                      |
| C-G-A-C-A                                                                                          | 22 (4.5)             | 24 (3.2)             | 0.741 (0.408 - 1.347)    | 0.355                 | 0.666                      |
| C-G-A-C-G                                                                                          | 6 (1.2)              | 1 (0.1)              | 0.113 (0.014 - 0.946)    | 0.021                 | 0.105                      |
| C-G-A-T-A                                                                                          | 1 (0.3)              | 1 (0.2)              | 0.679 (0.042 - 10.910)   | 1.000                 | 1.000                      |
| C-G-A-T-G                                                                                          | 2 (0.4)              | 20 (2.7)             | 6.793 (1.575 - 29.300)   | 0.003                 | 0.023                      |
| C-G-G-C-A                                                                                          | 4 (0.8)              | 3 (0.4)              | 0.510 (0.113 - 2.294)    | 0.451                 | 0.752                      |
| C-G-G-C-G                                                                                          | 0 (0.0)              | 1 (0.2)              | 2.039 (0.083 - 50.270)   | 1.000                 | 1.000                      |
| C-G-G-T-G                                                                                          | 5 (1.1)              | 37 (4.9)             | 5.027 (1.952 - 12.950)   | 0.0001                | 0.002                      |
| A-A-A-C-A                                                                                          | 5 (1.0)              | 61 (8.2)             | 8.288 (3.289 - 20.890)   | <0.0001               | 0.002                      |
| A-A-A-C-G                                                                                          | 2 (0.5)              | 6 (0.8)              | 2.038 (0.408 - 10.170)   | 0.485                 | 0.766                      |
| A-A-A-T-A                                                                                          | 9 (1.8)              | 1 (0.2)              | 0.075 (0.010 - 0.599)    | 0.002                 | 0.020                      |
| A-A-A-T-G                                                                                          | 11 (2.3)             | 7 (0.9)              | 0.432 (0.166 - 1.129)    | 0.078                 | 0.234                      |
| A-A-G-C-A                                                                                          | 2 (0.3)              | 0 (0.0)              | 0.136 (0.006 - 2.844)    | 0.165                 | 0.354                      |
| A-A-G-C-G                                                                                          | 0 (0.0)              | 1 (0.1)              | 2.039 (0.083 - 50.270)   | 1.000                 | 1.000                      |
| A-A-G-T-A                                                                                          | 1 (0.3)              | 3 (0.4)              | 2.038 (0.211 - 19.700)   | 0.651                 | 0.829                      |
| A-A-G-T-G                                                                                          | 2 (0.4)              | 1 (0.1)              | 0.340 (0.031 - 3.766)    | 0.569                 | 0.813                      |
| A-G-A-C-A                                                                                          | 1 (0.2)              | 4 (0.5)              | 2.717 (0.302 - 24.450)   | 0.653                 | 0.829                      |
| A-G-A-C-G                                                                                          | 3 (0.7)              | 3 (0.5)              | 0.679 (0.136 - 3.391)    | 0.691                 | 0.829                      |
| A-G-A-T-A                                                                                          | 4 (0.9)              | 3 (0.4)              | 0.510 (0.113 - 2.294)    | 0.451                 | 0.752                      |
| A-G-A-T-G                                                                                          | 23 (4.8)             | 19 (2.6)             | 0.561 (0.300 - 1.050)    | 0.067                 | 0.234                      |
| A-G-G-C-A                                                                                          | 0 (0.0)              | 2 (0.3)              | 3.399 (0.162 - 71.110)   | 0.518                 | 0.777                      |
| A-G-G-C-G                                                                                          | 0 (0.0)              | 9 (1.2)              | 12.910 (0.748 - 222.900) | 0.013                 | 0.078                      |
| A-G-G-T-A                                                                                          | 1 (0.2)              | 2 (0.3)              | 1.359 (0.123 - 15.060)   | 1.000                 | 1.000                      |
| A-G-G-T-G                                                                                          | 9 (1.9)              | 24 (3.3)             | 1.812 (0.830 - 3.955)    | 0.148                 | 0.354                      |
| <b>rs882605 C&gt;A / rs1104760 A&gt;G / rs2688513 A&gt;G / rs2258447 C&gt;T</b>                    |                      |                      |                          |                       |                            |
| C-A-A-C                                                                                            | 317 (66.4)           | 475 (63.5)           | 1.000 (reference)        |                       |                            |
| C-A-A-T                                                                                            | 12 (2.6)             | 10 (1.3)             | 0.556 (0.237 - 1.303)    | 0.171                 | 0.263                      |
| C-A-G-C                                                                                            | 31 (6.5)             | 21 (2.8)             | 0.452 (0.255 - 0.801)    | 0.005                 | 0.013                      |
| C-A-G-T                                                                                            | 4 (0.9)              | 8 (1.0)              | 1.335 (0.398 - 4.471)    | 0.771                 | 0.964                      |
| C-G-A-C                                                                                            | 28 (5.9)             | 26 (3.5)             | 0.620 (0.357 - 1.077)    | 0.087                 | 0.163                      |

|                                                                                 |            |            |                          |         |       |
|---------------------------------------------------------------------------------|------------|------------|--------------------------|---------|-------|
| C-G-A-T                                                                         | 3 (0.6)    | 21 (2.8)   | 4.672 (1.381 - 15.800)   | 0.005   | 0.013 |
| C-G-G-C                                                                         | 4 (0.7)    | 4 (0.5)    | 0.667 (0.166 - 2.689)    | 0.720   | 0.964 |
| C-G-G-T                                                                         | 5 (1.1)    | 38 (5.1)   | 5.072 (1.975 - 13.030)   | 0.0002  | 0.002 |
| A-A-A-C                                                                         | 7 (1.5)    | 69 (9.2)   | 6.578 (2.984 - 14.500)   | <0.0001 | 0.002 |
| A-A-A-T                                                                         | 22 (4.6)   | 9 (1.2)    | 0.273 (0.124 - 0.601)    | 0.001   | 0.005 |
| A-A-G-C                                                                         | 1 (0.3)    | 1 (0.1)    | 0.667 (0.042 - 10.720)   | 1.000   | 1.000 |
| A-A-G-T                                                                         | 1 (0.3)    | 3 (0.4)    | 2.002 (0.207 - 19.340)   | 1.000   | 1.000 |
| A-G-A-C                                                                         | 4 (0.9)    | 6 (0.8)    | 1.001 (0.280 - 3.577)    | 1.000   | 1.000 |
| A-G-A-T                                                                         | 27 (5.7)   | 22 (3.0)   | 0.544 (0.304 - 0.972)    | 0.037   | 0.079 |
| A-G-G-C                                                                         | 0 (0.0)    | 11 (1.4)   | 15.360 (0.901 - 261.700) | 0.004   | 0.013 |
| A-G-G-T                                                                         | 10 (2.1)   | 25 (3.4)   | 1.668 (0.790 - 3.522)    | 0.175   | 0.263 |
| <b>rs882605 C&gt;A / rs1104760 A&gt;G / rs2688513 A&gt;G / rs2291652 A&gt;G</b> |            |            |                          |         |       |
| C-A-A-A                                                                         | 291 (60.8) | 428 (57.2) | 1.000 (reference)        |         |       |
| C-A-A-G                                                                         | 40 (8.3)   | 59 (7.8)   | 1.003 (0.654 - 1.539)    | 0.990   | 1.000 |
| C-A-G-A                                                                         | 28 (5.9)   | 20 (2.7)   | 0.486 (0.268 - 0.879)    | 0.015   | 0.075 |
| C-A-G-G                                                                         | 7 (1.5)    | 8 (1.0)    | 0.777 (0.279 - 2.167)    | 0.629   | 0.726 |
| C-G-A-A                                                                         | 23 (4.9)   | 28 (3.7)   | 0.828 (0.467 - 1.466)    | 0.516   | 0.678 |
| C-G-A-G                                                                         | 8 (1.8)    | 19 (2.5)   | 1.615 (0.697 - 3.739)    | 0.259   | 0.470 |
| C-G-G-A                                                                         | 5 (1.0)    | 3 (0.3)    | 0.408 (0.097 - 1.721)    | 0.282   | 0.470 |
| C-G-G-G                                                                         | 3 (0.6)    | 39 (5.2)   | 8.839 (2.705 - 28.880)   | <0.0001 | 0.001 |
| A-A-A-A                                                                         | 12 (2.6)   | 63 (8.5)   | 3.570 (1.891 - 6.737)    | <0.0001 | 0.001 |
| A-A-A-G                                                                         | 16 (3.3)   | 14 (1.9)   | 0.595 (0.286 - 1.238)    | 0.161   | 0.345 |
| A-A-G-A                                                                         | 3 (0.7)    | 2 (0.3)    | 0.453 (0.075 - 2.731)    | 0.401   | 0.602 |
| A-A-G-G                                                                         | 0 (0.0)    | 1 (0.2)    | 2.041 (0.083 - 50.310)   | 1.000   | 1.000 |
| A-G-A-A                                                                         | 5 (1.1)    | 5 (0.7)    | 0.680 (0.195 - 2.370)    | 0.542   | 0.678 |
| A-G-A-G                                                                         | 25 (5.2)   | 23 (3.1)   | 0.626 (0.348 - 1.124)    | 0.114   | 0.342 |
| A-G-G-A                                                                         | 0 (0.0)    | 4 (0.6)    | 6.123 (0.328 - 114.200)  | 0.153   | 0.345 |
| A-G-G-G                                                                         | 11 (2.3)   | 33 (4.4)   | 2.040 (1.014 - 4.102)    | 0.042   | 0.158 |
| <b>rs882605 C&gt;A / rs1104760 A&gt;G / rs2258447 C&gt;T / rs2291652 A&gt;G</b> |            |            |                          |         |       |
| C-A-C-A                                                                         | 310 (64.9) | 441 (59.0) | 1.000 (reference)        |         |       |
| C-A-C-G                                                                         | 38 (8.0)   | 56 (7.5)   | 1.036 (0.669 - 1.604)    | 0.874   | 0.874 |
| C-A-T-A                                                                         | 8 (1.6)    | 8 (1.1)    | 0.703 (0.261 - 1.894)    | 0.484   | 0.660 |
| C-A-T-G                                                                         | 9 (1.8)    | 9 (1.3)    | 0.703 (0.276 - 1.791)    | 0.477   | 0.660 |
| C-G-C-A                                                                         | 26 (5.5)   | 27 (3.6)   | 0.730 (0.418 - 1.275)    | 0.313   | 0.535 |
| C-G-C-G                                                                         | 5 (1.1)    | 2 (0.3)    | 0.281 (0.054 - 1.459)    | 0.134   | 0.335 |
| C-G-T-A                                                                         | 2 (0.3)    | 1 (0.2)    | 0.352 (0.032 - 3.896)    | 0.573   | 0.716 |
| C-G-T-G                                                                         | 7 (1.4)    | 57 (7.7)   | 5.724 (2.576 - 12.720)   | <0.0001 | 0.001 |
| A-A-C-A                                                                         | 7 (1.4)    | 61 (8.1)   | 6.126 (2.764 - 13.570)   | <0.0001 | 0.001 |
| A-A-C-G                                                                         | 2 (0.5)    | 7 (1.0)    | 2.460 (0.508 - 11.930)   | 0.321   | 0.535 |
| A-A-T-A                                                                         | 10 (2.0)   | 4 (0.5)    | 0.281 (0.087 - 0.905)    | 0.029   | 0.145 |
| A-A-T-G                                                                         | 13 (2.8)   | 8 (1.1)    | 0.433 (0.177 - 1.056)    | 0.073   | 0.274 |

|                                                                                  |            |            |                          |         |       |
|----------------------------------------------------------------------------------|------------|------------|--------------------------|---------|-------|
| A-G-C-A                                                                          | 1 (0.2)    | 6 (0.7)    | 4.218 (0.505 - 35.230)   | 0.250   | 0.535 |
| A-G-C-G                                                                          | 3 (0.7)    | 12 (1.6)   | 2.812 (0.787 - 10.050)   | 0.116   | 0.335 |
| A-G-T-A                                                                          | 5 (1.1)    | 5 (0.7)    | 0.703 (0.202 - 2.450)    | 0.749   | 0.864 |
| A-G-T-G                                                                          | 32 (6.8)   | 43 (5.7)   | 0.945 (0.584 - 1.527)    | 0.807   | 0.865 |
| <b>rs882605 C&gt;A / rs2688513 A&gt;G / rs2258447 C&gt;T / rs2291652 A&gt;G</b>  |            |            |                          |         |       |
| C-A-C-A                                                                          | 305 (63.7) | 445 (59.4) | 1.000 (reference)        |         |       |
| C-A-C-G                                                                          | 41 (8.6)   | 57 (7.6)   | 0.953 (0.622 - 1.461)    | 0.825   | 0.873 |
| C-A-T-A                                                                          | 5 (1.1)    | 8 (1.1)    | 1.097 (0.355 - 3.385)    | 0.873   | 0.873 |
| C-A-T-G                                                                          | 11 (2.2)   | 24 (3.2)   | 1.495 (0.722 - 3.099)    | 0.276   | 0.460 |
| C-G-C-A                                                                          | 32 (6.6)   | 21 (2.8)   | 0.450 (0.255 - 0.795)    | 0.005   | 0.023 |
| C-G-C-G                                                                          | 3 (0.6)    | 3 (0.4)    | 0.685 (0.137 - 3.420)    | 0.692   | 0.818 |
| C-G-T-A                                                                          | 5 (1.0)    | 2 (0.3)    | 0.274 (0.053 - 1.423)    | 0.129   | 0.276 |
| C-G-T-G                                                                          | 4 (0.9)    | 43 (5.8)   | 7.368 (2.617 - 20.740)   | <0.0001 | 0.001 |
| A-A-C-A                                                                          | 6 (1.3)    | 65 (8.7)   | 7.425 (3.177 - 17.360)   | <0.0001 | 0.001 |
| A-A-C-G                                                                          | 5 (1.1)    | 9 (1.2)    | 1.234 (0.409 - 3.718)    | 0.709   | 0.818 |
| A-A-T-A                                                                          | 12 (2.5)   | 4 (0.6)    | 0.229 (0.073 - 0.715)    | 0.009   | 0.023 |
| A-A-T-G                                                                          | 36 (7.6)   | 26 (3.5)   | 0.495 (0.293 - 0.837)    | 0.008   | 0.023 |
| A-G-C-A                                                                          | 1 (0.3)    | 4 (0.5)    | 2.742 (0.305 - 24.660)   | 0.653   | 0.818 |
| A-G-C-G                                                                          | 0 (0.0)    | 10 (1.3)   | 14.400 (0.840 - 246.800) | 0.007   | 0.023 |
| A-G-T-A                                                                          | 2 (0.5)    | 5 (0.6)    | 1.713 (0.330 - 8.893)    | 0.707   | 0.818 |
| A-G-T-G                                                                          | 10 (2.0)   | 24 (3.2)   | 1.645 (0.775 - 3.490)    | 0.190   | 0.356 |
| <b>rs1104760 A&gt;G / rs2688513 A&gt;G / rs2258447 C&gt;T / rs2291652 A&gt;G</b> |            |            |                          |         |       |
| A-A-C-A                                                                          | 290 (60.8) | 482 (64.4) | 1.000 (reference)        |         |       |
| A-A-C-G                                                                          | 36 (7.6)   | 62 (8.3)   | 1.036 (0.670 - 1.602)    | 0.873   | 1.000 |
| A-A-T-A                                                                          | 12 (2.5)   | 7 (1.0)    | 0.351 (0.137 - 0.902)    | 0.023   | 0.058 |
| A-A-T-G                                                                          | 21 (4.3)   | 12 (1.6)   | 0.344 (0.167 - 0.709)    | 0.003   | 0.020 |
| A-G-C-A                                                                          | 27 (5.7)   | 19 (2.5)   | 0.423 (0.231 - 0.775)    | 0.004   | 0.020 |
| A-G-C-G                                                                          | 4 (0.8)    | 3 (0.4)    | 0.451 (0.100 - 2.031)    | 0.435   | 0.653 |
| A-G-T-A                                                                          | 5 (1.1)    | 5 (0.7)    | 0.602 (0.173 - 2.097)    | 0.420   | 0.653 |
| A-G-T-G                                                                          | 2 (0.4)    | 6 (0.8)    | 1.805 (0.362 - 9.006)    | 0.717   | 0.919 |
| G-A-C-A                                                                          | 23 (4.8)   | 29 (3.9)   | 0.759 (0.431 - 1.337)    | 0.338   | 0.634 |
| G-A-C-G                                                                          | 9 (1.9)    | 3 (0.3)    | 0.201 (0.054 - 0.747)    | 0.013   | 0.039 |
| G-A-T-A                                                                          | 6 (1.3)    | 4 (0.6)    | 0.401 (0.112 - 1.434)    | 0.191   | 0.409 |
| G-A-T-G                                                                          | 24 (5.1)   | 40 (5.3)   | 1.003 (0.592 - 1.698)    | 0.992   | 1.000 |
| G-G-C-A                                                                          | 4 (0.8)    | 5 (0.7)    | 0.752 (0.200 - 2.824)    | 0.735   | 0.919 |
| G-G-C-G                                                                          | 0 (0.0)    | 11 (1.4)   | 13.850 (0.812 - 236.000) | 0.009   | 0.034 |
| G-G-T-A                                                                          | 1 (0.2)    | 2 (0.3)    | 1.203 (0.109 - 13.340)   | 1.000   | 1.000 |
| G-G-T-G                                                                          | 15 (3.1)   | 60 (8.0)   | 2.407 (1.342 - 4.317)    | 0.003   | 0.020 |
| <b>rs882605 C&gt;A / rs1104760 A&gt;G / rs2688513 A&gt;G</b>                     |            |            |                          |         |       |
| C-A-A                                                                            | 331 (69.3) | 486 (65.0) |                          |         |       |
| C-A-G                                                                            | 35 (7.2)   | 27 (3.7)   | 0.525 (0.312 - 0.885)    | 0.014   | 0.026 |

|                                                              |            |            |                        |         |        |
|--------------------------------------------------------------|------------|------------|------------------------|---------|--------|
| C-G-A                                                        | 32 (6.6)   | 46 (6.2)   | 0.979 (0.610 - 1.570)  | 0.930   | 0.930  |
| C-G-G                                                        | 8 (1.6)    | 42 (5.6)   | 3.576 (1.657 - 7.715)  | 0.001   | 0.007  |
| A-A-A                                                        | 28 (5.8)   | 77 (10.4)  | 1.873 (1.189 - 2.951)  | 0.006   | 0.021  |
| A-A-G                                                        | 4 (0.8)    | 4 (0.5)    | 0.681 (0.169 - 2.743)  | 0.587   | 0.685  |
| A-G-A                                                        | 30 (6.4)   | 28 (3.8)   | 0.636 (0.373 - 1.084)  | 0.094   | 0.132  |
| A-G-G                                                        | 11 (2.3)   | 37 (4.9)   | 2.291 (1.152 - 4.556)  | 0.015   | 0.026  |
| <b>rs882605 C&gt;A / rs1104760 A&gt;G / rs2258447 C&gt;T</b> |            |            |                        |         |        |
| C-A-C                                                        | 349 (72.9) | 496 (66.3) |                        |         |        |
| C-A-T                                                        | 17 (3.5)   | 17 (2.3)   | 0.704 (0.354 - 1.398)  | 0.313   | 0.365  |
| C-G-C                                                        | 32 (6.6)   | 30 (4.0)   | 0.660 (0.394 - 1.106)  | 0.112   | 0.157  |
| C-G-T                                                        | 8 (1.7)    | 59 (7.9)   | 5.189 (2.448 - 11.000) | <0.0001 | 0.000  |
| A-A-C                                                        | 9 (1.8)    | 69 (9.3)   | 5.394 (2.657 - 10.950) | <0.0001 | 0.000  |
| A-A-T                                                        | 23 (4.8)   | 12 (1.7)   | 0.367 (0.180 - 0.748)  | 0.004   | 0.009  |
| A-G-C                                                        | 4 (0.8)    | 17 (2.2)   | 2.990 (0.997 - 8.966)  | 0.040   | 0.070  |
| A-G-T                                                        | 37 (7.8)   | 47 (6.4)   | 0.894 (0.569 - 1.405)  | 0.626   | 0.626  |
| <b>rs882605 C&gt;A / rs1104760 A&gt;G / rs2291652 A&gt;G</b> |            |            |                        |         |        |
| C-A-A                                                        | 318 (66.6) | 448 (59.9) |                        |         |        |
| C-A-G                                                        | 47 (9.9)   | 66 (8.8)   | 0.997 (0.668 - 1.488)  | 0.987   | 0.987  |
| C-G-A                                                        | 28 (5.9)   | 30 (4.0)   | 0.761 (0.446 - 1.298)  | 0.314   | 0.621  |
| C-G-G                                                        | 11 (2.3)   | 58 (7.7)   | 3.743 (1.933 - 7.245)  | <0.0001 | 0.000  |
| A-A-A                                                        | 16 (3.4)   | 65 (8.7)   | 2.884 (1.638 - 5.077)  | 0.0001  | 0.0004 |
| A-A-G                                                        | 15 (3.2)   | 15 (2.1)   | 0.710 (0.342 - 1.473)  | 0.355   | 0.621  |
| A-G-A                                                        | 5 (1.1)    | 10 (1.3)   | 1.420 (0.481 - 4.194)  | 0.524   | 0.734  |
| A-G-G                                                        | 36 (7.6)   | 56 (7.4)   | 1.104 (0.709 - 1.719)  | 0.661   | 0.771  |
| <b>rs882605 C&gt;A / rs2688513 A&gt;G / rs2258447 C&gt;T</b> |            |            |                        |         |        |
| C-A-C                                                        | 345 (72.2) | 500 (66.9) |                        |         |        |
| C-A-T                                                        | 16 (3.3)   | 32 (4.2)   | 1.380 (0.746 - 2.554)  | 0.303   | 0.303  |
| C-G-C                                                        | 35 (7.4)   | 24 (3.2)   | 0.473 (0.276 - 0.810)  | 0.005   | 0.009  |
| C-G-T                                                        | 9 (1.9)    | 46 (6.2)   | 3.527 (1.704 - 7.301)  | 0.0003  | 0.001  |
| A-A-C                                                        | 12 (2.5)   | 75 (10.0)  | 4.313 (2.309 - 8.055)  | <0.0001 | 0.001  |
| A-A-T                                                        | 49 (10.2)  | 31 (4.2)   | 0.437 (0.273 - 0.699)  | 0.0004  | 0.001  |
| A-G-C                                                        | 1 (0.2)    | 13 (1.8)   | 8.970 (1.167 - 68.920) | 0.011   | 0.015  |
| A-G-T                                                        | 12 (2.5)   | 27 (3.6)   | 1.553 (0.776 - 3.107)  | 0.211   | 0.246  |
| <b>rs882605 C&gt;A / rs2688513 A&gt;G / rs2291652 A&gt;G</b> |            |            |                        |         |        |
| C-A-A                                                        | 312 (65.3) | 455 (60.8) |                        |         |        |
| C-A-G                                                        | 51 (10.7)  | 77 (10.3)  | 1.035 (0.707 - 1.517)  | 0.859   | 0.859  |
| C-G-A                                                        | 35 (7.2)   | 22 (2.9)   | 0.431 (0.248 - 0.749)  | 0.002   | 0.005  |
| C-G-G                                                        | 7 (1.5)    | 48 (6.4)   | 4.702 (2.100 - 10.530) | <0.0001 | 0.001  |
| A-A-A                                                        | 18 (3.7)   | 68 (9.2)   | 2.590 (1.511 - 4.442)  | 0.0004  | 0.001  |
| A-A-G                                                        | 40 (8.4)   | 37 (5.0)   | 0.634 (0.397 - 1.015)  | 0.056   | 0.098  |
| A-G-A                                                        | 4 (0.8)    | 8 (1.1)    | 1.371 (0.409 - 4.595)  | 0.607   | 0.708  |

|                                                               |            |            |                        |         |       |
|---------------------------------------------------------------|------------|------------|------------------------|---------|-------|
| A-G-G                                                         | 12 (2.4)   | 32 (4.3)   | 1.829 (0.927 - 3.606)  | 0.078   | 0.109 |
| <b>rs882605 C&gt;A / rs2258447 C&gt;T / rs2291652 A&gt;G</b>  |            |            |                        |         |       |
| C-C-A                                                         | 336 (70.3) | 466 (62.3) |                        |         |       |
| C-C-G                                                         | 44 (9.3)   | 59 (7.8)   | 0.967 (0.639 - 1.464)  | 0.873   | 0.873 |
| C-T-A                                                         | 10 (2.0)   | 9 (1.3)    | 0.649 (0.261 - 1.615)  | 0.349   | 0.407 |
| C-T-G                                                         | 15 (3.2)   | 68 (9.1)   | 3.269 (1.836 - 5.818)  | <0.0001 | 0.000 |
| A-C-A                                                         | 8 (1.6)    | 68 (9.2)   | 6.129 (2.906 - 12.920) | <0.0001 | 0.000 |
| A-C-G                                                         | 5 (1.0)    | 19 (2.6)   | 2.740 (1.013 - 7.413)  | 0.039   | 0.077 |
| A-T-A                                                         | 15 (3.1)   | 9 (1.3)    | 0.433 (0.187 - 1.001)  | 0.044   | 0.077 |
| A-T-G                                                         | 46 (9.6)   | 49 (6.6)   | 0.768 (0.502 - 1.176)  | 0.224   | 0.314 |
| <b>rs1104760 A&gt;G / rs2688513 A&gt;G / rs2258447 C&gt;T</b> |            |            |                        |         |       |
| A-A-C                                                         | 325 (68.0) | 544 (72.7) |                        |         |       |
| A-A-T                                                         | 33 (7.0)   | 19 (2.6)   | 0.344 (0.192 - 0.615)  | 0.0002  | 0.001 |
| A-G-C                                                         | 32 (6.8)   | 21 (2.9)   | 0.392 (0.222 - 0.692)  | 0.001   | 0.004 |
| A-G-T                                                         | 6 (1.3)    | 11 (1.4)   | 1.095 (0.401 - 2.990)  | 0.859   | 0.859 |
| G-A-C                                                         | 33 (6.9)   | 32 (4.2)   | 0.579 (0.350 - 0.960)  | 0.033   | 0.058 |
| G-A-T                                                         | 30 (6.2)   | 43 (5.8)   | 0.856 (0.527 - 1.392)  | 0.531   | 0.620 |
| G-G-C                                                         | 3 (0.6)    | 15 (2.0)   | 2.987 (0.858 - 10.400) | 0.071   | 0.099 |
| G-G-T                                                         | 16 (3.3)   | 63 (8.4)   | 2.352 (1.336 - 4.142)  | 0.002   | 0.005 |
| <b>rs1104760 A&gt;G / rs2688513 A&gt;G / rs2291652 A&gt;G</b> |            |            |                        |         |       |
| A-A-A                                                         | 302 (63.2) | 491 (65.7) |                        |         |       |
| A-A-G                                                         | 57 (11.9)  | 73 (9.7)   | 0.788 (0.541 - 1.146)  | 0.212   | 0.357 |
| A-G-A                                                         | 33 (6.8)   | 23 (3.0)   | 0.429 (0.247 - 0.744)  | 0.002   | 0.007 |
| A-G-G                                                         | 6 (1.2)    | 9 (1.2)    | 0.923 (0.325 - 2.618)  | 0.880   | 0.880 |
| G-A-A                                                         | 28 (6.0)   | 32 (4.3)   | 0.703 (0.415 - 1.191)  | 0.188   | 0.357 |
| G-A-G                                                         | 34 (7.1)   | 42 (5.6)   | 0.760 (0.473 - 1.221)  | 0.255   | 0.357 |
| G-G-A                                                         | 5 (1.1)    | 7 (0.9)    | 0.861 (0.271 - 2.738)  | 0.800   | 0.880 |
| G-G-G                                                         | 14 (2.8)   | 72 (9.6)   | 3.163 (1.753 - 5.708)  | <0.0001 | 0.001 |
| <b>rs1104760 A&gt;G / rs2258447 C&gt;T / rs2291652 A&gt;G</b> |            |            |                        |         |       |
| A-C-A                                                         | 317 (66.3) | 501 (67.0) |                        |         |       |
| A-C-G                                                         | 41 (8.5)   | 64 (8.6)   | 0.988 (0.651 - 1.498)  | 0.954   | 0.971 |
| A-T-A                                                         | 17 (3.7)   | 12 (1.6)   | 0.447 (0.211 - 0.948)  | 0.031   | 0.093 |
| A-T-G                                                         | 22 (4.6)   | 18 (2.4)   | 0.518 (0.273 - 0.981)  | 0.040   | 0.093 |
| G-C-A                                                         | 27 (5.6)   | 33 (4.4)   | 0.773 (0.456 - 1.311)  | 0.339   | 0.549 |
| G-C-G                                                         | 9 (1.8)    | 14 (1.8)   | 0.984 (0.421 - 2.301)  | 0.971   | 0.971 |
| G-T-A                                                         | 7 (1.4)    | 7 (0.9)    | 0.633 (0.220 - 1.821)  | 0.392   | 0.549 |
| G-T-G                                                         | 39 (8.2)   | 99 (13.3)  | 1.606 (1.080 - 2.388)  | 0.018   | 0.093 |
| <b>rs2688513 A&gt;G / rs2258447 C&gt;T / rs2291652 A&gt;G</b> |            |            |                        |         |       |
| A-C-A                                                         | 310 (64.9) | 510 (68.2) |                        |         |       |
| A-C-G                                                         | 47 (9.9)   | 65 (8.6)   | 0.841 (0.563 - 1.255)  | 0.396   | 0.396 |
| A-T-A                                                         | 18 (3.7)   | 12 (1.6)   | 0.405 (0.193 - 0.853)  | 0.014   | 0.033 |

|                                            |            |            |                        |         |        |
|--------------------------------------------|------------|------------|------------------------|---------|--------|
| A-T-G                                      | 46 (9.6)   | 51 (6.9)   | 0.674 (0.442 - 1.029)  | 0.066   | 0.092  |
| G-C-A                                      | 34 (7.0)   | 24 (3.2)   | 0.429 (0.250 - 0.737)  | 0.002   | 0.007  |
| G-C-G                                      | 2 (0.4)    | 13 (1.8)   | 3.951 (0.885 - 17.630) | 0.052   | 0.091  |
| G-T-A                                      | 7 (1.4)    | 7 (0.9)    | 0.608 (0.211 - 1.750)  | 0.351   | 0.396  |
| G-T-G                                      | 15 (3.1)   | 66 (8.8)   | 2.675 (1.500 - 4.768)  | 0.001   | 0.007  |
| <b>rs882605 C&gt;A / rs1104760 A&gt;G</b>  |            |            |                        |         |        |
| C-A                                        | 366 (76.5) | 513 (68.6) |                        |         |        |
| C-G                                        | 39 (8.2)   | 89 (11.8)  | 1.628 (1.092 - 2.428)  | 0.016   | 0.024  |
| A-A                                        | 31 (6.6)   | 82 (10.9)  | 1.887 (1.222 - 2.914)  | 0.004   | 0.012  |
| A-G                                        | 42 (8.7)   | 64 (8.6)   | 1.087 (0.720 - 1.641)  | 0.691   | 0.691  |
| <b>rs882605 C&gt;A / rs2688513 A&gt;G</b>  |            |            |                        |         |        |
| C-A                                        | 363 (76.0) | 532 (71.1) |                        |         |        |
| C-G                                        | 42 (8.7)   | 70 (9.4)   | 1.137 (0.758 - 1.705)  | 0.534   | 0.534  |
| A-A                                        | 58 (12.1)  | 106 (14.2) | 1.247 (0.882 - 1.764)  | 0.212   | 0.318  |
| A-G                                        | 15 (3.2)   | 40 (5.3)   | 1.820 (0.990 - 3.343)  | 0.051   | 0.153  |
| <b>rs882605 C&gt;A / rs2258447 C&gt;T</b>  |            |            |                        |         |        |
| C-C                                        | 380 (79.6) | 525 (70.1) |                        |         |        |
| C-T                                        | 25 (5.2)   | 77 (10.3)  | 2.229 (1.393 - 3.568)  | 0.001   | 0.002  |
| A-C                                        | 13 (2.6)   | 87 (11.7)  | 4.844 (2.665 - 8.806)  | <0.0001 | 0.000  |
| A-T                                        | 60 (12.6)  | 59 (7.8)   | 0.712 (0.485 - 1.044)  | 0.081   | 0.081  |
| <b>rs882605 C&gt;A / rs2291652 A&gt;G</b>  |            |            |                        |         |        |
| C-A                                        | 346 (72.5) | 477 (63.7) |                        |         |        |
| C-G                                        | 59 (12.3)  | 125 (16.8) | 1.537 (1.095 - 2.157)  | 0.013   | 0.020  |
| A-A                                        | 22 (4.5)   | 76 (10.2)  | 2.506 (1.528 - 4.108)  | 0.0002  | 0.001  |
| A-G                                        | 51 (10.8)  | 69 (9.3)   | 0.981 (0.666 - 1.446)  | 0.924   | 0.924  |
| <b>rs1104760 A&gt;G / rs2688513 A&gt;G</b> |            |            |                        |         |        |
| A-A                                        | 359 (75.1) | 564 (75.4) |                        |         |        |
| A-G                                        | 38 (8.0)   | 31 (4.2)   | 0.519 (0.317 - 0.850)  | 0.008   | 0.012  |
| G-A                                        | 62 (13.0)  | 74 (9.9)   | 0.760 (0.529 - 1.092)  | 0.137   | 0.137  |
| G-G                                        | 19 (3.9)   | 79 (10.5)  | 2.647 (1.576 - 4.443)  | 0.0001  | 0.0003 |
| <b>rs1104760 A&gt;G / rs2258447 C&gt;T</b> |            |            |                        |         |        |
| A-C                                        | 357 (74.8) | 565 (75.6) |                        |         |        |
| A-T                                        | 40 (8.3)   | 30 (4.0)   | 0.474 (0.290 - 0.775)  | 0.002   | 0.006  |
| G-C                                        | 36 (7.5)   | 47 (6.3)   | 0.825 (0.524 - 1.299)  | 0.405   | 0.405  |
| G-T                                        | 45 (9.5)   | 106 (14.2) | 1.488 (1.025 - 2.162)  | 0.036   | 0.054  |
| <b>rs1104760 A&gt;G / rs2291652 A&gt;G</b> |            |            |                        |         |        |
| A-A                                        | 334 (70.0) | 513 (68.6) |                        |         |        |
| A-G                                        | 63 (13.1)  | 82 (10.9)  | 0.847 (0.594 - 1.210)  | 0.362   | 0.362  |
| G-A                                        | 34 (7.0)   | 40 (5.3)   | 0.766 (0.475 - 1.235)  | 0.273   | 0.362  |
| G-G                                        | 47 (9.9)   | 113 (15.2) | 1.565 (1.084 - 2.260)  | 0.016   | 0.048  |
| <b>rs2688513 A&gt;G / rs2258447 C&gt;T</b> |            |            |                        |         |        |

|                                            |            |            |                       |        |        |
|--------------------------------------------|------------|------------|-----------------------|--------|--------|
| A-C                                        | 357 (74.8) | 575 (76.9) |                       |        |        |
| A-T                                        | 64 (13.3)  | 63 (8.4)   | 0.611 (0.421 - 0.887) | 0.009  | 0.014  |
| G-C                                        | 36 (7.4)   | 37 (5.0)   | 0.638 (0.396 - 1.029) | 0.063  | 0.063  |
| G-T                                        | 21 (4.5)   | 73 (9.7)   | 2.158 (1.305 - 3.569) | 0.002  | 0.006  |
| <b>rs2688513 A&gt;G / rs2291652 A&gt;G</b> |            |            |                       |        |        |
| A-A                                        | 330 (69.0) | 523 (69.9) |                       |        |        |
| A-G                                        | 91 (19.1)  | 115 (15.4) | 0.797 (0.586 - 1.085) | 0.149  | 0.149  |
| G-A                                        | 38 (8.0)   | 30 (4.0)   | 0.498 (0.303 - 0.820) | 0.005  | 0.008  |
| G-G                                        | 19 (3.9)   | 80 (10.7)  | 2.657 (1.581 - 4.464) | 0.0001 | 0.0003 |
| <b>rs2258447 C&gt;T / rs2291652 A&gt;G</b> |            |            |                       |        |        |
| C-A                                        | 344 (71.9) | 534 (71.4) |                       |        |        |
| C-G                                        | 49 (10.3)  | 78 (10.4)  | 1.025 (0.700 - 1.503) | 0.897  | 0.897  |
| T-A                                        | 24 (5.1)   | 19 (2.5)   | 0.510 (0.275 - 0.945) | 0.030  | 0.089  |
| T-G                                        | 61 (12.7)  | 117 (15.7) | 1.236 (0.881 - 1.732) | 0.219  | 0.329  |

Note: RPL, recurrent pregnancy loss; OR, odds ratio; CI, confidence interval; FDR, false discovery rate.

<sup>a</sup> Fisher's exact test; <sup>b</sup> FDR-adjusted *P* value.



**Supplementary Table S2.** The PCR primer sequence and enzyme used for SNP genotyping

| SNP                       | Primer                                                                                                 | Annealing temperature | Enzyme        | Reaction temperature |
|---------------------------|--------------------------------------------------------------------------------------------------------|-----------------------|---------------|----------------------|
| <i>MUC4</i> rs882605 C>A  | Forward: 5' – CAC CTC AGC AGC CTT AGT AAT A – 3'<br>Reverse: 5' – TGA TGT TGT AAC CGG TGT G – 3'       | 58°C                  | <i>Ssp</i> I  | 37°C                 |
| <i>MUC4</i> rs1104760 A>G | Forward: 5' – CCA CTT ACA GAT AGT GAT GTC TCC – 3'<br>Reverse: 5' – CTC AAA TCA ACA CCC TCA ACA C – 3' | 55°C                  | <i>Bcc</i> I  |                      |
| <i>MUC4</i> rs2688513 A>G | Forward: 5' - ACA TAA AGG CGA GGC AGT TG – 3'<br>Reverse: 5' - ACC CCT CTT CCT GTC ACC A – 3'          | 54°C                  | <i>Bst</i> NI |                      |
| <i>MUC4</i> rs2291652 A>G | Forward: 5' - GAA GCC CCA TCC AAC ACT GG – 3'<br>Reverse: 5' - GAC TCA CGG GCT GTC ACA TC – 3'         | 55°C                  | <i>Bcc</i> I  |                      |
| <i>MUC4</i> rs2258447 C>T | TaqMan probe SNP genotyping assay kit                                                                  |                       |               |                      |
